# Supplementary material for: A Simple Method to Measure Renal Function in Swine by the Plasma Clearance of Iohexol
Source: Int J Mol Sci. 2018 Jan 12;19(1):232. doi: 10.3390/ijms19010232 (PMC5796180; doi:10.3390/ijms19010232)
Supplement: Supplementary file 1 [file ijms-19-00232-s001.pdf]

## Supporting information

**S1 Table. Regression models.** 10 linear and non-linear regression models were developed

| Equation    | Resume of the models |            |      |      |         | Regression coefficients |            |                                   |                         |
|-------------|----------------------|------------|------|------|---------|-------------------------|------------|-----------------------------------|-------------------------|
|             | R square             | F-Snedecor | DF 1 | DF 2 | P-Value | Intercept               | Beta 1     | Beta 2                            | Beta 3                  |
| Linear      | 0.96                 | 141.7      | 1    | 6    | <0.001  | 17.885                  | 0.737      | $-6.3968 \times 10^{-4}$<br>0.002 | $-2.493 \times 10^{-6}$ |
| Logaritmnic | 0.95                 | 127.6      | 1    | 6    | <0.001  | -1035.718               | 226.259    |                                   |                         |
| Inverse     | 0.87                 | 39.9       | 1    | 6    | 0.001   | 459.672                 | -57505.551 |                                   |                         |
| Quadratic   | 0.97                 | 77.1       | 2    | 5    | <0.001  | -47.909                 | 1.176      |                                   |                         |
| Cubic       | 0.97                 | 43.3       | 3    | 4    | 0.002   | 23.880                  | 0.407      |                                   |                         |
| Compound    | 0.90                 | 54.8       | 1    | 6    | <0.001  | 89.741                  | 1.003      |                                   |                         |
| Power       | 0.96                 | 148.9      | 1    | 6    | <0.001  | 0.960                   | 0.967      |                                   |                         |
| S-curve     | 0.94                 | 98.3       | 1    | 6    | <0.001  | 6.388                   | -255.2     |                                   |                         |
| Exponential | 0.90                 | 54.8       | 1    | 6    | <0.001  | 89.741                  | 0.003      |                                   |                         |
| Logistic    | 0.90                 | 54.8       | 1    | 6    | <0.001  | 0.011                   | 0.997      |                                   |                         |

**S2 Table. Reproducibility study.** Iohexol plasma clearance for the Simplified method (SM) in two occasions in two occasions on two weeks apart in a group of 12 adult iberian pigs. The precision (time-to-time variability) was evaluated as mean absolute percentage error (MAPE) of GFR (ml/min) for each case.

| PIG ID      | GFR REPLICA 1 | GFR REPLICA 2 | MAPE       |
|-------------|---------------|---------------|------------|
| 1           | 131.3         | 126.4         | 3.7        |
| 2           | 122.9         | 128.5         | 4.5        |
| 3           | 175.5         | 151.1         | 13.9       |
| 4           | 146.5         | 121.8         | 16.8       |
| 5           | 221.7         | 185.5         | 16.4       |
| 6           | 142.4         | 146.6         | 2.9        |
| 7           | 154.2         | 167.1         | 8.4        |
| 8           | 188.1         | 191.1         | 1.6        |
| 9           | 136.5         | 155.3         | 13.8       |
| 10          | 202.4         | 217.7         | 7.6        |
| 11          | 164.5         | 184.0         | 11.8       |
| 12          | 245.6         | 219.8         | 10.5       |
| <b>Mean</b> | <b>169.3</b>  | <b>166.3</b>  | <b>9.3</b> |
